# Supplementary material for: A Review of MIS 5e Sea-level Proxies around Japan
Source: Copernicus journal article supplement (doi:10.5194/essd-2020-365), 2020-12-14
Supplement: Supplementary file [file essd-2020-365-RC1-supplement.pdf]

A Review of MIS 5e Sea-level Proxies around Japan  
By Evan Tam and Yusuke Yokoyama

General. This is an excellent paper, comprehensive, well-written and valuable in documenting last interglacial shorelines from extra-tropical regions in the Japanese archipelago. It's value lies not only in global MIS5e sea level reconstruction, but in documenting coastal uplift and subsidence given the very broad range of elevations of MIS5e paleoshorelines. The extensive tephra dating is a positive development. Having worked on Japanese Quaternary deposits myself years ago, I know the meticulous geomorphological and stratigraphic correlations are excellent, based on decades of careful field work. The authors are careful to point out limitations of tephra chronology and paleo-sea level elevations from terraces. The maps are excellent. I wonder if it would be easy to add a map showing regions uplift and subsidence rates around Japan based on MMIS5e shorelines. The current maps show the actual elevations, but not rates. Otherwise, I cannot find any major flaws in the study. It will be an excellent addition to the WALIS program.

\Minor

Line 34 Otto-Bliesner

Line 75 mollusks? Mollusca ?

Line 504 coral-rich

In Table 3 please double check the *Genus* name has upper case first letter but *species* names are lower case.
